# Supplementary material
Source: publisher figshare collection journal article supplement (https://acs.figshare.com/ndownloader/files/25997686)
Supplement: Supplementary file 1 [file 25997686]

# Controlled Formation of All-Aqueous Janus Droplets by Liquid-Liquid Phase Separation of an Aqueous Three-Phase System

Qingchun Song, Youchuang Chao, Yage Zhang, and Ho Cheung Shum\*

Department of Mechanical Engineering, Faculty of Engineering, The University of Hong Kong,

Hong Kong (SAR), China

\* To whom correspondence should be addressed:

Email:

[ashum@hku.hk](mailto:ashum@hku.hk)

The supporting information contains the following components:

- 1) A typical movie showing the evolution of an initial single-phase droplet into a Janus droplet after phase separation. The scale bar is 300  $\mu\text{m}$ . (**Movie S1**)
- 2) The table containing the osmolality of aqueous drop phases with different solute concentrations. (**Table S1**)
- 3) The figure illustrating the diameter of the jets under different outer fluid flow rates in glass-capillary microfluidic devices. (**Figure S1**)
- 4) A typical movie showing the droplet generation with perturbation in glass-capillary microfluidics and the obtained Janus droplets. The scale bar is 200  $\mu\text{m}$ . (**Movie S2**)
- 5) The table showing the density of each phase of phase-separated DEX, PEtOx and PEG with three different compositions.
- 6) The figure illustrating the partitioning behavior of 50 wt% DOPC-50 wt% DOPS liposomes in the Janus droplets.

1) See the uploaded video content.

2) The table illustrating the osmolality of the drop phases with different compositions

**Table S1.** Osmolality of the aqueous solutions\*

| NO. | DEX T10<br>(wt%)  | PEtOx<br>(wt%) | Osmolality<br>(mOsm/kg) |
|-----|-------------------|----------------|-------------------------|
| 1   | 8                 | 2              | 54±1                    |
| 2   | 3                 | 6              | 57±2                    |
| 3   | 5                 | 5              | 73±1                    |
| NO. | DEX T500<br>(wt%) | PEtOx<br>(wt%) | Osmolality<br>(mOsm/kg) |
| 1   | 3                 | 5              | 32±1                    |
| 2   | 4                 | 2              | 20±1                    |

\* Average values and standard errors are obtained from 3 independent measurements.

3) The figure shows the diameter of the jets under different outer fluid flow rates in a glass-capillary microfluidic device at constant inner fluid flow rate  $Q_{in}$  without perturbation.

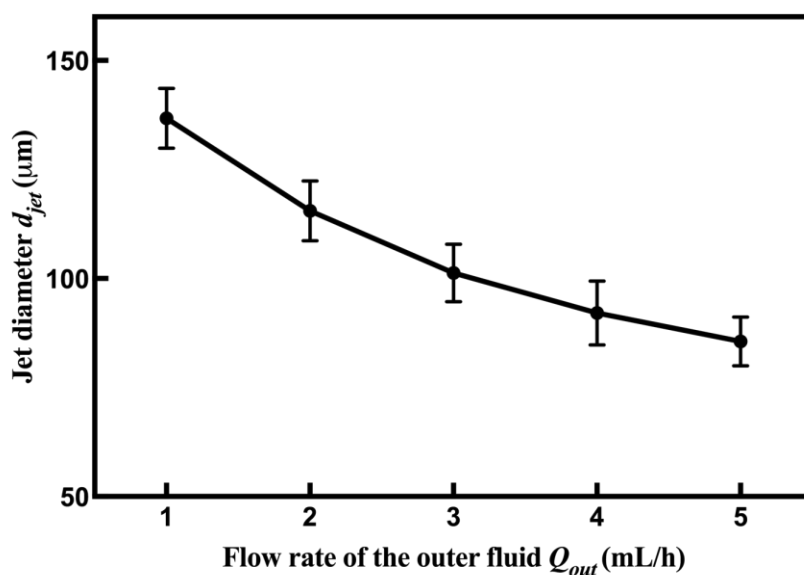

**Figure S1.** Plot of the diameter of the inner jets  $d_{jet}$  as a function of the outer fluid flow rates  $Q_{out}$ , ranging from 1.0 to 5.0 mL/h.  $Q_{in} = 20 \mu\text{L/h}$ .

4) See the uploaded video content.

5) The table showing the density of each phase of the phase-separated DEX, PEtOx and PEG with three different compositions.

**Table S2.** Density of three phases from the phase-separated A3PSs with different compositions\*

| Composition of A3PSs              | Phase            | Density<br>(g/cm <sup>3</sup> ) |
|-----------------------------------|------------------|---------------------------------|
| 10 wt% DEX-10 wt% PEtOx-2 wt% PEG | PEG-rich phase   | 1.039                           |
|                                   | PEtOx-rich phase | 1.040                           |
|                                   | DEX-rich phase   | 1.090                           |
| 10 wt% DEX-15 wt% PEtOx-2 wt% PEG | PEG-rich phase   | 1.041                           |
|                                   | PEtOx-rich phase | 1.047                           |
|                                   | DEX-rich phase   | 1.110                           |
| 8 wt% DEX-12 wt% PEtOx-3 wt% PEG  | PEG-rich phase   | 1.037                           |
|                                   | PEtOx-rich phase | 1.042                           |
|                                   | DEX-rich phase   | 1.105                           |

\* Average values are obtained from 3 independent measurements.

6) The figure illustrating the partitioning behavior of 50 wt% DOPC-50 wt% DOPS liposomes in the Janus droplets

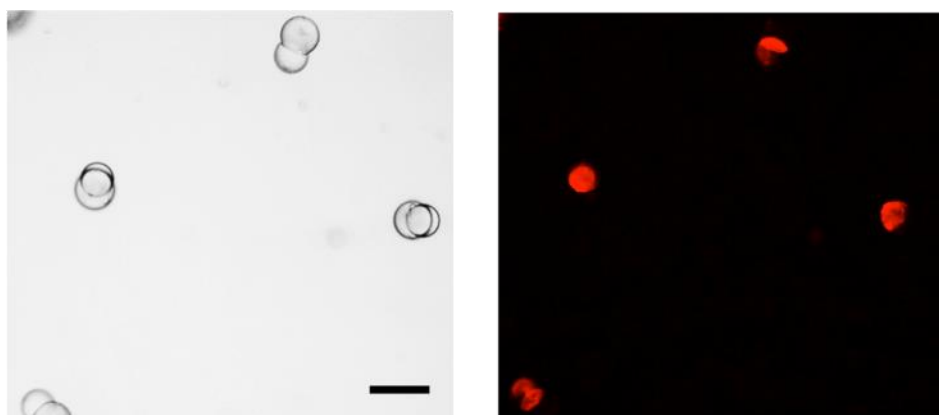

**Figure S2.** The microscope and fluorescence microscope images showing the partitioning of 50 wt% DOPC-50 wt% DOPS Rhodamine-labelled (red) liposomes in the Janus droplets. The 50 wt% DOPC-50 wt% DOPS liposomes mainly partition into the DEX-rich phase of the Janus droplets. The scale bar is 200  $\mu$ m.
